# Supplementary material for: Selective adsorption and extraction of C70 and higher fullerenes on a reusable metal–organic framework MIL-101(Cr)
Source: Royal Society of Chemistry journal article supplement (doi:10.1039/c2jm31886e), 2012-01-01
Supplement: c2jm31886e.pdf [file c2jm31886e.pdf]

## **Electronic Supplementary Information (ESI)**

# **Selective Adsorption and Extraction of C70 and Higher Fullerenes on Reusable Metal-Organic Framework MIL-101(Cr)**

Cheng-Xiong Yang, and Xiu-Ping Yan\*

*State Key Laboratory of Medicinal Chemical Biology, and Research Center for Analytical*

*Sciences, College of Chemistry, Nankai University, Tianjin 300071, China*

E-mail: [xpyan@nankai.edu.cn](mailto:xpyan@nankai.edu.cn)

**Table S1.** Intraparticle diffusion constants for different initial fullerene concentrations.

|     | $C_0$ (mg L <sup>-1</sup> ) | $K_{i1}$ (mg g <sup>-1</sup> h <sup>-0.5</sup> ) | $c_1$ | $R^2$ | $K_{i2}$ (mg g <sup>-1</sup> h <sup>-0.5</sup> ) | $c_2$ | $R^2$ |
|-----|-----------------------------|--------------------------------------------------|-------|-------|--------------------------------------------------|-------|-------|
| C60 | 50                          | 1.0 ± 0.2                                        | -0.2  | 0.851 | 0.008 ± 0.002                                    | 0.7   | 0.939 |
|     | 100                         | 0.5 ± 0.1                                        | -0.2  | 0.921 | 0.049 ± 0.006                                    | 0.3   | 0.934 |
|     | 200                         | 0.3 ± 0.1                                        | -0.1  | 0.982 | 0.033 ± 0.004                                    | 0.2   | 0.904 |
| C70 | 50                          | 17.4 ± 3.8                                       | 6.6   | 0.908 | 1.3 ± 0.4                                        | 18.3  | 0.849 |
|     | 100                         | 8.1 ± 3.3                                        | 3.9   | 0.917 | 0.9 ± 0.3                                        | 8.9   | 0.913 |
|     | 200                         | 4.6 ± 0.3                                        | 1.2   | 0.992 | 0.2 ± 0.05                                       | 4.4   | 0.921 |

**Table S2.** Surface area datas for the different stages of MIL-101(Cr).

| MOFs                                | BET surface area (m <sup>2</sup> g <sup>-1</sup> ) |
|-------------------------------------|----------------------------------------------------|
| MIL-101(Cr)                         | 1845                                               |
| MIL-101(Cr) after adsorption of C70 | 803                                                |
| MIL-101(Cr) after regeneration      | 1686                                               |

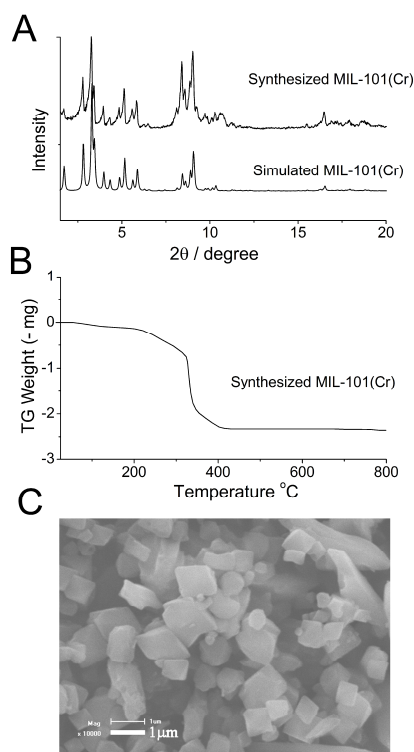

**Fig. S1** Characterization of the synthesized MIL-101(Cr): (A) XRD patterns; (B) TGA curve; (C) SEM image.

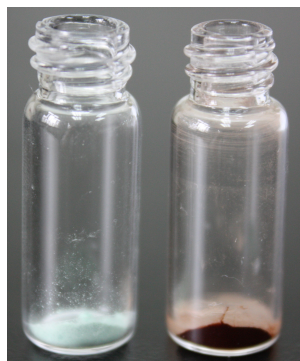

**Fig. S2** MIL-101(Cr) crystals before (left) and after (right) adsorption of C70.

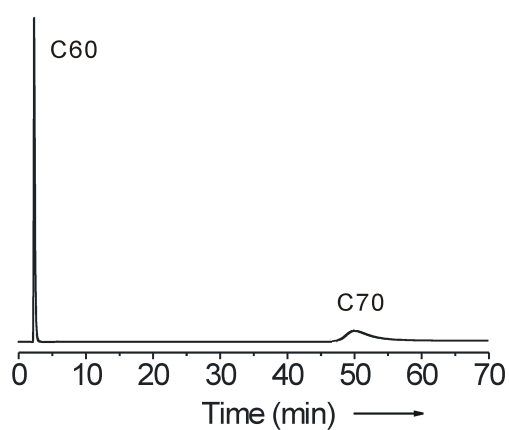

**Fig. S3** HPLC separation of C60 and C70 mixture (5  $\mu\text{L}$ , 400  $\text{mg L}^{-1}$  each) on a MIL-101(Cr) packed column (3 cm long  $\times$  4.6 mm i.d.) using toluene as the mobile phase (1  $\text{mL min}^{-1}$ ) at room temperature with a UV detector at 340 nm.

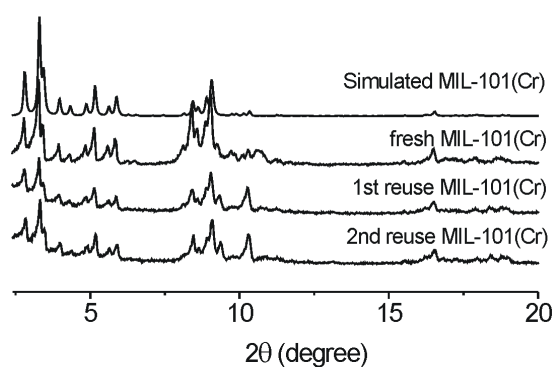

**Fig. S4** Comparison of the XRD patterns of fresh and regenerated MIL-101(Cr).
